# Supplementary material
Source: publisher site journal article supplement (https://www.dovepress.com/article/489791)
Supplement: Supplementary file 1 [file get_supplementary_file.php]

# Supplementary Material

**Supplementary Table 1.** Subgroup definitions

| **Subgroup** | **Definition** |
| --- | --- |
| **HFrEF** | ≥1 medical claim with an ICD-9/10-CM code for diastolic HF during the full pre-index period through six months after the index date  AND  No claims for systolic HF or undetermined HF during the full pre-index period |
| **HFpEF** | ≥1 medical claim with an ICD-9/10-CM code for systolic HF during the full pre-index period through six months after the index date  AND  No claims with an ICD-9/10-CM code for diastolic HF or undetermined HF during the full pre-index period |
| **undHF** | ≥1 medical claim with an ICD-9/10-CM code for combined HF during the full pre-index period through six months after the index date  OR  ≥1 medical claim with an ICD-9/10-CM code for systolic HF AND ≥1 medical claim with an ICD-9/10-CM code for diastolic HF during the full pre-index period through six months after the index date |
| **CKD with T2D** | ≥1 medical claim with an ICD-9/10-CM code for CKD in an *inpatient* setting during the full pre-index period through six months after the index date OR ≥2 medical claim with an ICD-9/10-CM code for CKD in an *outpatient* setting during the full pre-index period through six months after the index date  AND  ≥1 medical claim with an ICD-9/10-CM code for T2D in an *inpatient* setting during the full pre-index period through six months after the index date OR ≥2 medical claim with an ICD-9/10-CM code for T2D in an *outpatient* setting during the full pre-index period through six months after the index date  AND  No claims with an ICD-9/10-CM code for T1D during the full pre-index period  OR  ≥1 medical claim with an ICD-9/10-CM code for CKD in T2D in an *inpatient* setting during the full pre-index period through six months after the index date OR ≥2 medical claim with an ICD-9/10-CM code for CKD in T2D in an *outpatient* setting during the full pre-index period through six months after the index date  AND  No claims with an ICD-9/10-CM code for T1D during the full pre-index period |
| **ndCKD** | ≥1 medical claim with an ICD-9/10-CM code for CKD in an *inpatient* setting during the full pre-index period through six months after the index date OR ≥2 medical claim with an ICD-9/10-CM code for CKD in an *outpatient* setting during the full pre-index period through six months after the index date  AND  No claims with an ICD-9/10-CM code for T1D during the full pre-index period  AND  No claims with an ICD-9/10-CM code for T2D during the full pre-index period  AND  No claims with an ICD-9/10-CM code for CKD in T1D during the full pre-index period  AND  No claims with an ICD-9/10-CM code for CKD in T1D during the full pre-index period |
| **“all other patients”** | Patients who met the selection criteria but did not meet the criteria for any of the subgroups described above |

**Abbreviations:** CKD, chronic kidney disease; HF, heart failure; HFpEF, heart failure with preserved ejection fraction; HFrEF, heart failure with reduced ejection fraction; ICD-9/10-CM, International Classification of Diseases, Ninth/Tenth Revision, Clinical Modification, ndCKD, nondiabetic chronic kidney disease; T1D, type 1 diabetes; T2D, type 2 diabetes; undHF, undetermined heart failure.

**Supplementary Table 2.** Code lists used to define subgroups

| **Condition** | **Description (if different than condition)** | **ICD-9-CM** | **ICD-10-CM** |
| --- | --- | --- | --- |
| **Diagnosis Codes** | **Diagnosis Codes** |
| T2D | | 250.x0, 250.x2 | E11.% |
| T1D | | 250.x1, 250.x3 | E10.% |
| CKD | | 403.00-.01, 403.10-.11, 403.90-.91, 581.x, 582.x, 585.1-585.4, 585.9, 587, 274.10, 274.19 | I12.9, I13.0, I13.10, N02.2, N04.0, N04.3, N04.4, N04.8, N04.9, N08, N18.1-N18.4,N18.9, N25.89, R80.9, D63.1, M10.3% |
| CKD in T2D | | 250.40, 250.42 | E11.2% |
| CKD in T1D | | 250.41, 250.43 | E10.2% |
| Systolic HF | Systolic heart failure, unspecified | 428.20 | I50.20 |
| Chronic systolic heart failure | 428.22 | I50.22 |
| Acute on chronic systolic heart failure | 428.23 | I50.23 |
| Cardiomyopathy | 425.5, 425.1, 425.9, 425.2, 425.7, 425.8, 425.4, 425.3, 452.11, 425.18 | I42.6, I42.1, I42.2, I42.7,I42.9, I42.8, I42.0, I42.5 |
| Diastolic HF | Diastolic heart failure, unspecified | 428.30 | I50.30 |
| Chronic diastolic heart failure | 428.32 | I50.32 |
| Acute on chronic diastolic heart failure | 428.33 | I50.33 |
| Combined HF | Combined systolic and diastolic heart failure, unspecified | 428.40 | I50.40 |
| Chronic combined systolic and diastolic heart failure | 428.42 | I50.42 |
| Acute on chronic combined systolic and diastolic heart failure | 428.43 | I50.43 |
| Left heart failure | 428.1 | I50.1 |

**Abbreviations:** CKD, chronic kidney disease; HF, heart failure; ICD-9/10-CM, International Classification of Diseases, Ninth/Tenth Revision, Clinical Modification; T1D, type 1 diabetes; T2D, type 2 diabetes.

**Supplementary Table 3**. Additional patient characteristics used in the multivariate logistic regression

| **Variable** | **All eligible patients** | **HFpEF** | **HFrEF** | **UndHF** | **CKD and T2D** | **NdCKD** | **All other patients** |
| --- | --- | --- | --- | --- | --- | --- | --- |
| **Number of patients, N** | 224,100 | 8,553 | 19,636 | 20,336 | 11,336 | 10,134 | 171,374 |
| **Age categories (years), %** |  |  |  |  |  |  |  |
| 18–44 | 48.9% | 4.6% | 12.8% | 4.0% | 10.9% | 6.1% | 61.3% |
| 45–64 | 34.9% | 43.2% | 40.9% | 40.6% | 53.3% | 40.9% | 31.3% |
| 65–74 | 8.5% | 24.6% | 17.3% | 22.3% | 18.8% | 21.6% | 4.8% |
| 75–84 | 5.2% | 19.1% | 16.3% | 20.5% | 12.0% | 19.7% | 2.0% |
| 85+ | 2.5% | 8.5% | 12.6% | 12.6% | 5.0% | 11.6% | 0.7% |
| **Health-plan type, %** |  |  |  |  |  |  |  |
| HMO | 21.9% | 35.3% | 28.5% | 35.8% | 35.2% | 29.7% | 18.9% |
| PPO | 58.9% | 55.3% | 57.5% | 53.7% | 54.7% | 58.1% | 59.8% |
| CDHP | 19.2% | 9.3% | 14.0% | 10.4% | 9.9% | 12.2% | 21.4% |
| **Geographic region,%** |  |  |  |  |  |  |  |
| Midwest | 25.0% | 36.9% | 30.5% | 37.0% | 34.6% | 32.0% | 22.6% |
| Northeast | 12.2% | 11.7% | 13.3% | 13.5% | 11.8% | 10.7% | 12.0% |
| South | 37.4% | 29.8% | 33.8% | 28.5% | 32.6% | 32.3% | 39.0% |
| West | 21.7% | 19.2% | 19.1% | 18.7% | 18.7% | 22.3% | 22.5% |
| Unknown | 3.7% | 2.4% | 3.2% | 2.3% | 2.4% | 2.6% | 3.9% |
| **Index prescriber specialty, %** |  |  |  |  |  |  |  |
| PCP | 21.5% | 32.5% | 26.5% | 32.0% | 34.7% | 32.4% | 18.9% |
| Nephrologist | 2.3% | 4.7% | 2.0% | 2.5% | 13.7% | 13.9% | 1.1% |
| Cardiologist | 11.5% | 32.3% | 39.9% | 32.3% | 19.5% | 20.0% | 5.5% |
| Dermatologist | 22.4% | 0.5% | 0.8% | 0.2% | 0.69% | 2.2% | 29.1% |
| Endocrinologist | 2.3% | 0.6% | 0.4% | 0.3% | 1.2% | 0.6% | 2.8% |
| Gastroenterologist/hepatologist | 1.2% | 1.4% | 0.8% | 0.7% | 2.0% | 2.1% | 1.2% |
| Non-physician prescribed | 25.5% | 16.6% | 19.1% | 20.4% | 16.9% | 16.5% | 27.7% |
| Other/unknown | 13.1% | 11.3% | 10.4% | 11.6% | 11.3% | 12.2% | 13.7% |
| **Length of pre-index continuous eligibility in months** |  |  |  |  |  |  |  |
| Mean (SD) | 65.4 (41.49) | 73.7 (44.71) | 69.8 (42.7) | 74.3 (44.42) | 70.9 (43.49) | 71.6 (43.2) | 63.3 (40.62) |
| Median (IQR) | 55.9 (32.0–89.2) | 64.6 (37.6–101.2) | 60.7 (36.3–95.3) | 65.4 (38.3–103.1) | 62.5 (35.9–96.8) | 62.6 (37.3–97.3) | 53.8 (30.6–86.3) |
| **SES index categories from worst (1) to best (4), %** |  |  |  |  |  |  |  |
| 1 | 16.9% | 21.4% | 20.1% | 21.7% | 23.3% | 19.6% | 15.6% |
| 2 | 22.3% | 27.3% | 26.3% | 26.5% | 26.6% | 25.7% | 21.0% |
| 3 | 25.6% | 26.8% | 27.2% | 26.5% | 26.6% | 26.8% | 25.3% |
| 4 | 32.7% | 22.3% | 23.9% | 23.2% | 21.3% | 25.8% | 35.5% |
| Unknown | 2.5% | 2.2% | 2.4% | 2.0% | 2.1% | 2.0% | 2.6% |
| **QCI score** |  |  |  |  |  |  |  |
| Mean (SD) | 1.7 (2.37) | 4.5 (2.63) | 3.8 (2.27) | 4.7 (2.43) | 4.9 (2.65) | 3.9 (2.59) | 0.9 (1.72) |
| Median (IQR) | 1 (0–3) | 4 (3–6) | 3 (2–5) | 4 (3–6) | 5 (3–6) | 3 (2–5) | 0 (0–1) |
| **QCI score categories, %** |  |  |  |  |  |  |  |
| 0 | 47.5% | 4.1% | 3.4% | 0.9% | 1.7% | 5.6% | 61.2% |
| 1 | 15.6% | 4.1% | 2.1% | 0.8% | 5.3% | 13.9% | 18.9% |
| 2 | 10.5% | 12.3% | 27.2% | 15.0% | 11.5% | 12.6% | 7.8% |
| ≥3 | 26.4% | 79.5% | 67.4% | 83.3% | 81.5% | 67.9% | 12.1% |
| **Comorbidities over full pre-index period%** |  |  |  |  |  |  |  |
| Acne | 30.9% | 2.6% | 3.4% | 2.3% | 2.5% | 5.3% | 39.4% |
| Androgenic alopecia | 3.2% | 1.6% | 1.2% | 1.1% | 1.4% | 2.0% | 3.7% |
| Anemia | 25.6% | 52.3% | 33.8% | 51.2% | 58.2% | 50.8% | 19.6% |
| Atrial fibrillation/flutter | 10.1% | 37.5% | 32.1% | 48.1% | 32.8% | 30.3% | 2.5% |
| CAD | 20.5% | 58.1% | 64.5% | 75.9% | 61.5% | 48.2% | 7.7% |
| COPD | 11.4% | 39.5% | 24.5% | 42.1% | 34.5% | 27.9% | 5.1% |
| Dyslipidemia | 45.0% | 85.0% | 75.4% | 84.0% | 91.5% | 73.5% | 34.0% |
| Hepatic failure | 2.0% | 3.3% | 2.9% | 3.4% | 4.6% | 5.3% | 1.4% |
| Hirsutism | 4.2% | 0.5% | 0.4% | 0.3% | 0.9% | 0.7% | 5.3% |
| Hyperkalemia | 3.2% | 9.8% | 6.1% | 12.4% | 14.8% | 10.8% | 1.3% |
| Hyponatremia | 6.2% | 18.6% | 11.2% | 19.7% | 19.5% | 18.0% | 3.2% |
| Hypokalemia | 13.1% | 32.8% | 19.1% | 29.7% | 30.8% | 33.9% | 8.7% |
| Ischemic stroke/TIA | 6.5% | 21.1% | 13.8% | 22.3% | 21.4% | 17.4% | 3.1% |
| MI | 8.9% | 21.2% | 33.7% | 40.9% | 29.3% | 21.8% | 2.3% |
| Nephrotic syndrome | 0.4% | 1.3% | 0.5% | 1.1% | 2.6% | 3.0% | 0.1% |
| Obesity | 33.1% | 59.3% | 43.9% | 50.6% | 59.8% | 39.0% | 28.0% |
| Ovarian dysfunction | 6.2% | 0.5% | 0.7% | 0.4% | 0.8% | 0.9% | 7.9% |
| Primary hyperaldosteronism | 0.2% | 0.2% | 0.2% | 0.1% | 0.5% | 0.5% | 0.1% |
| PVD | 14.3% | 43.8% | 30.4% | 46.5% | 43.3% | 36.4% | 7.2% |
| Resistant hypertension | 3.4% | 12.0% | 7.1% | 12.2% | 11.4% | 9.3% | 1.5% |
| **Medications of interest, %** |  |  |  |  |  |  |  |
| Beta-blockers | 27.6% | 64.5% | 64.5% | 73.9% | 70.0% | 58.6% | 15.8% |
| Calcium channel blockers | 19.2% | 48.3% | 28.3% | 34.4% | 49.4% | 42.7% | 13.6% |
| Thiazide diuretics | 18.0% | 35.9% | 22.3% | 24.6% | 36.9% | 31.5% | 14.8% |
| Loop diuretics | 16.4% | 61.8% | 41.0% | 66.4% | 55.8% | 44.4% | 5.8% |
| NSAIDs | 21.8% | 24.3% | 20.4% | 18.7% | 20.0% | 19.4% | 22.1% |

**Abbreviations:** CAD, coronary artery disease; CDHP, consumer-directed health plan; CKD, chronic kidney disease; COPD, chronic obstructive pulmonary disease; HFpEF, heart failure with preserved ejection fraction; HFrEF, heart failure with reduced ejection fraction; HMO, health maintenance organization; IQR, interquartile range; MI, myocardial infarction; N, number; ndCKD, nondiabetic chronic kidney disease; NSAID, nonsteroidal anti-inflammatory drug; PCP, primary care provider; PPO, preferred provider organization; PVD, peripheral vascular disease; QCI, Quan–Charlson Comorbidity Index; SD, standard deviation; SES, socioeconomic status; TIA, transient ischemic attack; T2D, type 2 diabetes; undHF, undetermined heart failure.

**Supplementary Table 4.** Odds ratios for the association between baseline variables and risk of sMRA discontinuation among all new sMRA users

|  | **All eligible patients** | **HFpEF** | **HFrEF** | **UndHF** | **CKD and T2D** | **NdCKD** | **All other patients** |
| --- | --- | --- | --- | --- | --- | --- | --- |
| **Number of patients, N** | 224,100 | 8,553 | 19,636 | 20,336 | 11,336 | 10,134 | 171,374 |
|  | **OR** | **OR** | **OR** | **OR** | **OR** | **OR** | **OR** |
| **Demographics** | | | | | | | |
| Age ≥45 years old (reference: <45 years old) | 0.85 | 0.77 | 0.92 | 1.07 | 0.87 | 0.75 | 0.90 |
| Male (reference: Female) | 0.81 | 0.98 | 1.01 | 0.96 | 0.91 | 0.99 | 0.77 |
| Medicare (reference: Commercial) | 1.10 | 1.05 | 1.26 | 1.14 | 1.08 | 1.04 | 1.07 |
| Region (reference: South) |  |  |  |  |  |  |  |
| Midwest | 0.86 | 0.96 | 0.92 | 0.96 | 0.89 | 0.85 | 0.84 |
| Northeast | 0.82 | 0.88 | 0.90 | 0.90 | 0.78 | 0.87 | 0.80 |
| West | 1.06 | 1.06 | 1.17 | 1.32 | 1.09 | 1.11 | 1.01 |
| Unknown | 1.75 | 1.86 | 1.60 | 1.82 | 2.08 | 1.79 | 1.74 |
| Index prescriber specialty (reference: PCP) |  |  |  |  |  |  |  |
| Nephrology | 0.99 | 1.09 | 1.18 | 0.89 | 0.98 | 0.78 | 1.04 |
| Cardiology | 0.84 | 0.73 | 0.83 | 0.79 | 0.91 | 0.82 | 0.89 |
| Dermatology | 1.35 | 1.24 | 2.56 | 3.04 | 1.44 | 2.69 | 1.35 |
| Endocrinology | 0.94 | 1.03 | 0.94 | 0.81 | 1.55 | 0.69 | 0.94 |
| Gastroenterology/hepatology | 0.97 | 0.76 | 1.44 | 1.10 | 1.21 | 0.89 | 0.95 |
| Non-physician clinician | 1.14 | 0.86 | 0.92 | 0.87 | 1.02 | 0.94 | 1.20 |
| Other/unknown | 1.24 | 1.04 | 1.19 | 1.05 | 1.12 | 1.04 | 1.28 |
| SES index category (reference: 1) |  |  |  |  |  |  |  |
| 2 | 0.95 | 0.96 | 0.96 | 1.01 | 1.01 | 1.02 | 0.94 |
| 3 | 0.90 | 0.87 | 0.91 | 1.00 | 1.01 | 0.97 | 0.87 |
| 4 | 0.84 | 0.86 | 0.89 | 0.94 | 0.95 | 0.88 | 0.81 |
| Proportion White in community | 0.94 | 0.93 | 0.98 | 0.91 | 0.78 | 0.94 | 0.94 |
| **Comorbidities** |  |  |  |  |  |  |  |
| QCI score | 0.96 | 0.99 | 0.98 | 0.99 | 0.97 | 0.96 | 0.95 |
| Acne | 1.11 | 1.00 | 1.17 | 1.12 | 1.13 | 0.78 | 1.07 |
| Androgenetic alopecia | 1.18 | 1.13 | 1.32 | 0.98 | 1.15 | 1.25 | 1.16 |
| Anemia | 1.15 | 1.13 | 1.19 | 1.14 | 1.06 | 1.16 | 1.14 |
| Atrial fibrillation/flutter | 0.90 | 0.92 | 0.91 | 0.88 | 0.93 | 0.93 | 0.91 |
| CAD | 1.04 | 1.11 | 1.07 | 1.00 | 1.05 | 1.11 | 1.05 |
| Dyslipidemia | 1.00 | 1.05 | 1.01 | 1.08 | 1.01 | 1.11 | 1.01 |
| Hirsutism | 1.19 | 0.98 | 1.33 | 1.09 | 1.16 | 2.21 | 1.16 |
| Hyperkalemia | 1.06 | 1.01 | 1.03 | 1.10 | 1.00 | 1.05 | 1.00 |
| Hyponatremia | 1.00 | 0.98 | 1.02 | 1.03 | 1.13 | 1.04 | 0.96 |
| Hypokalemia | 0.91 | 0.89 | 1.00 | 0.98 | 0.92 | 1.04 | 0.89 |
| Ischemic stroke/TIA | 1.10 | 1.03 | 1.13 | 1.03 | 1.02 | 1.09 | 1.09 |
| MI | 0.92 | 0.94 | 0.92 | 0.94 | 0.93 | 0.91 | 0.94 |
| Obesity | 1.00 | 0.99 | 1.00 | 1.02 | 1.00 | 0.97 | 1.01 |
| Ovarian dysfunction | 0.99 | 0.88 | 1.07 | 1.14 | 1.23 | 0.97 | 0.97 |
| PVD | 1.08 | 1.07 | 1.02 | 1.01 | 1.09 | 0.92 | 1.07 |
| Hepatic failure | 0.90 | 0.88 | 0.86 | 0.76 | 0.88 | 0.98 | 0.98 |
| Nephrotic syndrome | 1.35 | 0.99 | 0.85 | 1.77 | 1.09 | 1.23 | 1.64 |
| Primary hyperaldosteronism | 0.96 | 1.91 | 0.75 | 3.86 | 0.94 | 0.74 | 0.96 |
| Resistant hypertension | 1.05 | 1.09 | 1.03 | 1.05 | 1.19 | 1.08 | 1.03 |
| **Medication use** |  |  |  |  |  |  |  |
| RAS inhibitors | 0.93 | 1.05 | 0.98 | 1.07 | 0.99 | 1.08 | 0.91 |
| Beta-blockers | 0.88 | 0.98 | 0.90 | 0.95 | 0.98 | 0.87 | 0.88 |
| Calcium channel blockers | 0.96 | 1.11 | 1.02 | 1.03 | 1.02 | 1.09 | 0.91 |
| Thiazide diuretics | 0.88 | 1.03 | 0.98 | 0.97 | 1.00 | 0.93 | 0.82 |
| Loop diuretics | 0.90 | 0.86 | 0.93 | 0.83 | 0.95 | 0.91 | 0.91 |
| NSAIDs | 1.09 | 1.02 | 1.00 | 1.05 | 1.03 | 1.00 | 1.12 |

**Abbreviations:** CAD, coronary artery disease; CKD, chronic kidney disease; HFpEF, heart failure with preserved ejection fraction; HFrEF, heart failure with reduced ejection fraction; MI, myocardial infarction; ndCKD, nondiabetic chronic kidney disease; N, number; NSAID, nonsteroidal anti-inflammatory drug; OR, odds ratio; PCP, primary care provider; PVD, peripheral vascular disease; QCI, Quan–Charlson Comorbidity Index; RAS, renin–angiotensin system; SES, socioeconomic status; sMRA, steroidal mineralocorticoid receptor antagonist; TIA, transient ischemic attack; T2D, type 2 diabetes; undHF, undetermined heart failure.
